# Supplementary material for: Office-based Plastic Surgery—Evidence-based Clinical and Administrative Guidelines
Source: PubMed Central journal article supplement — Plast Reconstr Surg Glob Open. 2022 Nov 9;10(11):e4634. doi: 10.1097/GOX.0000000000004634 (PMC9645793; doi:10.1097/gox.0000000000004634), 2022-11-09
Supplement: gox-10-e4634-s002.pdf [file gox-10-e4634-s002.pdf]

| Section                                      | Main Points                                                                                                                                                                                                                                                                                                                                                                                                                                                                                                                                                                                                                                                                                                                           |
|----------------------------------------------|---------------------------------------------------------------------------------------------------------------------------------------------------------------------------------------------------------------------------------------------------------------------------------------------------------------------------------------------------------------------------------------------------------------------------------------------------------------------------------------------------------------------------------------------------------------------------------------------------------------------------------------------------------------------------------------------------------------------------------------|
| <i>Accreditation</i>                         | <ul style="list-style-type: none"> <li>• Office-based practices in both in the U.S. or internationally should obtain accreditation from the AAAASF, AAAHC, or Joint Commission.</li> <li>• These organizations provide patients with reassurance and external validation that the practice adheres to the latest safety measures, guidelines, and practices.</li> <li>• ASPS and the Aesthetic Society mandate members operate in accredited facilities.</li> </ul>                                                                                                                                                                                                                                                                   |
| <i>Culture of Safety</i>                     | <ul style="list-style-type: none"> <li>• Ensuring a uniform culture in the office that promotes patient safety is key to minimizing patient risks and leading patient-centered care.</li> </ul>                                                                                                                                                                                                                                                                                                                                                                                                                                                                                                                                       |
| <i>Personnel and Training</i>                | <ul style="list-style-type: none"> <li>• All physicians and support staff must be properly licensed and prepared to practice within the scope of their training, experience level, and the facility's accreditation guidelines.</li> </ul>                                                                                                                                                                                                                                                                                                                                                                                                                                                                                            |
| <i>Informed Consent</i>                      | <ul style="list-style-type: none"> <li>• Informed consent is a basic tenet of medicine with the purpose of ensuring that patients understand all aspects of their proposed procedure.</li> <li>• Physicians must go to the furthest lengths to ensure informed consent is properly obtained for anesthesia and for the procedure.</li> <li>• The FDA released new labeling guidelines tying breast implant manufacturers and plastic surgeons to a higher level of accountability when educating patients about breast implants.</li> <li>• These new guidelines consist of five components including a comprehensive, implant-specific checklist that must be reviewed with patients during the informed consent process.</li> </ul> |
| <i>Fire Safety</i>                           | <ul style="list-style-type: none"> <li>• Effective communication and device management is crucial toward preventing operating room fires.</li> <li>• Teams should have fire safety protocols and drills in place to practice the order of operations in the event of a fire.</li> </ul>                                                                                                                                                                                                                                                                                                                                                                                                                                               |
| <i>Equipment and Sterility</i>               | <ul style="list-style-type: none"> <li>• The operating room must have all necessary equipment for intraoperative monitoring and potential adverse events.</li> <li>• Meticulous sterile and sharps technique and adherence to CDC guidelines are important in creating a safe operating room environment.</li> <li>• Proper and punctual management is necessary in the event of a sharps injury.</li> </ul>                                                                                                                                                                                                                                                                                                                          |
| <i>Documentation and Quality Improvement</i> | <ul style="list-style-type: none"> <li>• Thorough procedural documentation is recommended for the purposes of patient care, legal ramifications, and quality improvement.</li> </ul>                                                                                                                                                                                                                                                                                                                                                                                                                                                                                                                                                  |

|                                              |                                                                                                                                                                                                                                                                                                                                                                                                                                                                                           |
|----------------------------------------------|-------------------------------------------------------------------------------------------------------------------------------------------------------------------------------------------------------------------------------------------------------------------------------------------------------------------------------------------------------------------------------------------------------------------------------------------------------------------------------------------|
|                                              | <ul style="list-style-type: none"> <li>• Enrollment in formal quality improvement programs is recommended for the purpose of improving evidence-based medicine and patient care.</li> <li>• Use of prognostication tools may help with more efficient resource allocation and patient care.</li> </ul>                                                                                                                                                                                    |
| <i>Post-operative Care</i>                   | <ul style="list-style-type: none"> <li>• Post-operative nausea and vomiting is a leading cause of morbidity; there should be a focus on preventing and treating post-operative nausea and vomiting.</li> <li>• Proper post-operative care and discharge planning can reduce post-operative morbidity and complications while improving continuity of care.</li> </ul>                                                                                                                     |
| <i>Emergency and Transfer Protocols</i>      | <ul style="list-style-type: none"> <li>• In the event of an emergency, protocols must be in place to first stabilize patients and then transfer them to a hospital for higher level acute care.</li> <li>• Staff must be thoroughly familiar with these protocols and interventions in case of a real emergency.</li> </ul>                                                                                                                                                               |
| <i>Obesity and Procedure Characteristics</i> | <ul style="list-style-type: none"> <li>• Obesity, longer procedures, and combined procedures are associated with a higher risk of peri-operative complications.</li> <li>• Thorough clinical judgement and planning should be performed to ameliorate these risks.</li> </ul>                                                                                                                                                                                                             |
| <i>Homeopathic supplements</i>               | <ul style="list-style-type: none"> <li>• Surgeons must adequately and respectfully screen their patients before any procedure and ensure that supplements being taken will not negatively affect anesthesia, medications, the procedure, or the recovery process.</li> </ul>                                                                                                                                                                                                              |
| <i>Anesthesia</i>                            | <ul style="list-style-type: none"> <li>• Anesthesia options may include general anesthesia, local anesthesia, and conscious sedation.</li> <li>• Pre-operative evaluations using the ASA Patient Selection Physical Status Classification System effectively stratifies the risk of anesthesia and conscious sedation in patients.</li> <li>• The anesthetic technique must be chosen while considering both the patient's health profile and the proposed surgical procedure.</li> </ul> |
| <i>Antibiotic Prophylaxis</i>                | <ul style="list-style-type: none"> <li>• Preoperative antibiotics can generally reduce the risk of surgical infections and should be tailored to each patient.</li> <li>• Plastic surgeons should use their own clinical judgement with guidance from recommendations put forth by other surgical specialties when administering antibiotic prophylaxis.</li> </ul>                                                                                                                       |
| <i>Venous Thromboembolism (VTE)</i>          | <ul style="list-style-type: none"> <li>• A pre-operative history is necessary to document all risk factors for VTE.</li> <li>• The American Association of Plastic Surgeons released a guideline for the prevention of VTE in patients undergoing plastic surgery.</li> </ul>                                                                                                                                                                                                             |

|                                    |                                                                                                                                                                                                                                                                                                                                                                                            |
|------------------------------------|--------------------------------------------------------------------------------------------------------------------------------------------------------------------------------------------------------------------------------------------------------------------------------------------------------------------------------------------------------------------------------------------|
|                                    | <ul style="list-style-type: none"> <li>• Consider VTE chemoprophylaxis in patients undergoing abdominoplasty.</li> </ul>                                                                                                                                                                                                                                                                   |
| <i>Hypothermia</i>                 | <ul style="list-style-type: none"> <li>• Hypothermia can increase intra and post-operative morbidity and complications.</li> <li>• Measures to prevent hypothermia should be available and include strict monitoring of patients' vitals and temperature.</li> </ul>                                                                                                                       |
| <i>Malignant Hyperthermia (MH)</i> | <ul style="list-style-type: none"> <li>• Proper screening for MH must be conducted before surgery.</li> <li>• MH-susceptible patients may still undergo outpatient surgery if proper precautions are taken.</li> <li>• Proper equipment for the monitoring and treatment of MH must be available for patient stabilization before transfer to a higher acuity treatment center.</li> </ul> |
| <i>Multimodal Analgesia (MMA)</i>  | <ul style="list-style-type: none"> <li>• MMA and local anesthesia include NSAIDs, acetaminophen, gabapentinoids, muscle relaxants, steroids, and nerve blocks.</li> <li>• The usage of local anesthesia and adjunctive MMA can reduce post-operative morbidity, complications, and the need for opioids and potential resulting persistent opioid use.</li> </ul>                          |
